# Supplementary material for: Controlling the growth behaviour of multilayered films via layer-by-layer assembly with multiple interactions
Source: Royal Society of Chemistry journal article supplement (doi:10.1039/b906306d), 2009-01-01
Supplement: b906306d.pdf [file b906306d.pdf]

# **Controlling the growth behaviour of multilayered films via layer-by-layer assembly with multiple interactions**

Cao Li, Jing Zhang, Shuo Yang, Bo-Lan Li, Yong-Yong Li, Xian-Zheng Zhang\* and  
Ren-Xi Zhuo

Key Laboratory of Biomedical Polymers of Ministry of Education & Department of  
Chemistry, Wuhan University, Wuhan 430072, People's Republic of China.

## Characterization of polymer structures

In this study, CHI-g-Ph was synthesized from CHI and phthalic anhydride. The amine groups of chitosan were reacted with phthalic anhydride to obtain the water soluble CHI-g-Ph. Ph-CHI-g-CD was synthesized from CHI-g-Ph and vinyl  $\alpha$ -cyclodextrin through Michael addition between the amine group of CHI-g-Ph and the vinyl group of vinyl-CD.

The  $^1\text{H}$  NMR spectrum of CHI-g-Ph is shown in Supplementary Figure 1c. Compared with the spectrum of CHI reported in our previous work,<sup>1</sup> new peak appeared at 7.3 and 7.4 ppm in the spectrum of CHI-g-Ph is assigned to phenyl moiety. By comparing the intensity of the peak at 3.4-3.6 ppm (multiplet, assigned to glucosamine unit) with intensity of the peaks at 7.3 and 7.4 ppm, the substitution degree is calculated to be 12%.

The  $^1\text{H}$  NMR spectrum of Ph-CHI-g-CD is shown in Supplementary Figure 1b. Compared with the spectrum of CHI-g-Ph, new peaks appeared at 2.6 (j) and 6.0 (i) ppm in the spectrum of Ph-CHI-g-CD are assigned to  $\alpha$ -cyclodextrin moiety. The substitution degree of CD in Ph-CHI-g-CD is calculated to be 1.6%.

The  $^1\text{H}$  NMR spectrum of CHI-g-CD is shown in Supplementary Figure 1a. Peaks j and i in the spectrum of CHI-g-CD are assigned to  $\alpha$ -cyclodextrin moiety. The substitution degree is calculated to be 1.7%.

PASP and PASP-g-OD were synthesis from PSI. And the chemical structure of PASP-g-OD is confirmed by  $^1\text{H}$  NMR spectrum (Supplementary Figure 2I). The substitution degree is 13% as calculated from the  $^1\text{H}$  NMR spectrum of PASP-g-OD with DMSO- $\text{D}_6$  as the solvent.

The  $^1\text{H}$  NMR signals originating from both hydrophilic and hydrophobic parts in amphiphilic PASP-g-OD can be detected when using DMSO- $\text{D}_6$ . (Supplementary Figure 2I). Besides the signals of octadecyl chain ( $-\text{CH}_3$  protons centered at  $\delta = 0.85$  ppm,  $-\text{CH}_2$  protons centered at  $\delta = 1.2$  ppm and  $-\text{NHCH}_2$  protons centered at  $\delta = 3.5$  ppm), characteristic signals of PASP chain also appear in Supplementary Figure 3I. In contrast, the use of  $\text{D}_2\text{O}$  as  $^1\text{H}$  NMR solvent leads to insufficient mobility and a suppression of the signals of octadecyl chain. As shown in Supplementary Figure 2II, the use of  $\text{D}_2\text{O}$  results

in the total absence of the signals originating from octadecyl chain. This result also indicates the formation of PASP-g-OD micelles.

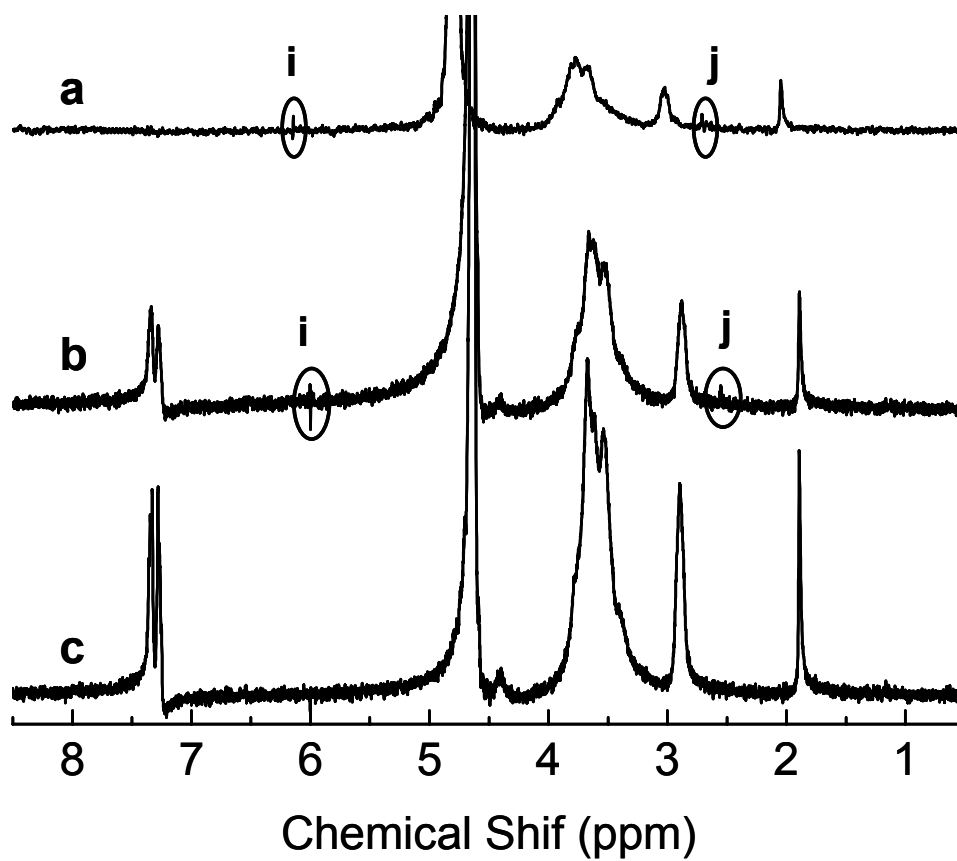

**Supplementary Figure 1.** <sup>1</sup>H NMR spectra of (a) CHI-g-CD, (b) Ph-CHI-g-CD and (c) CHI-g-Ph.

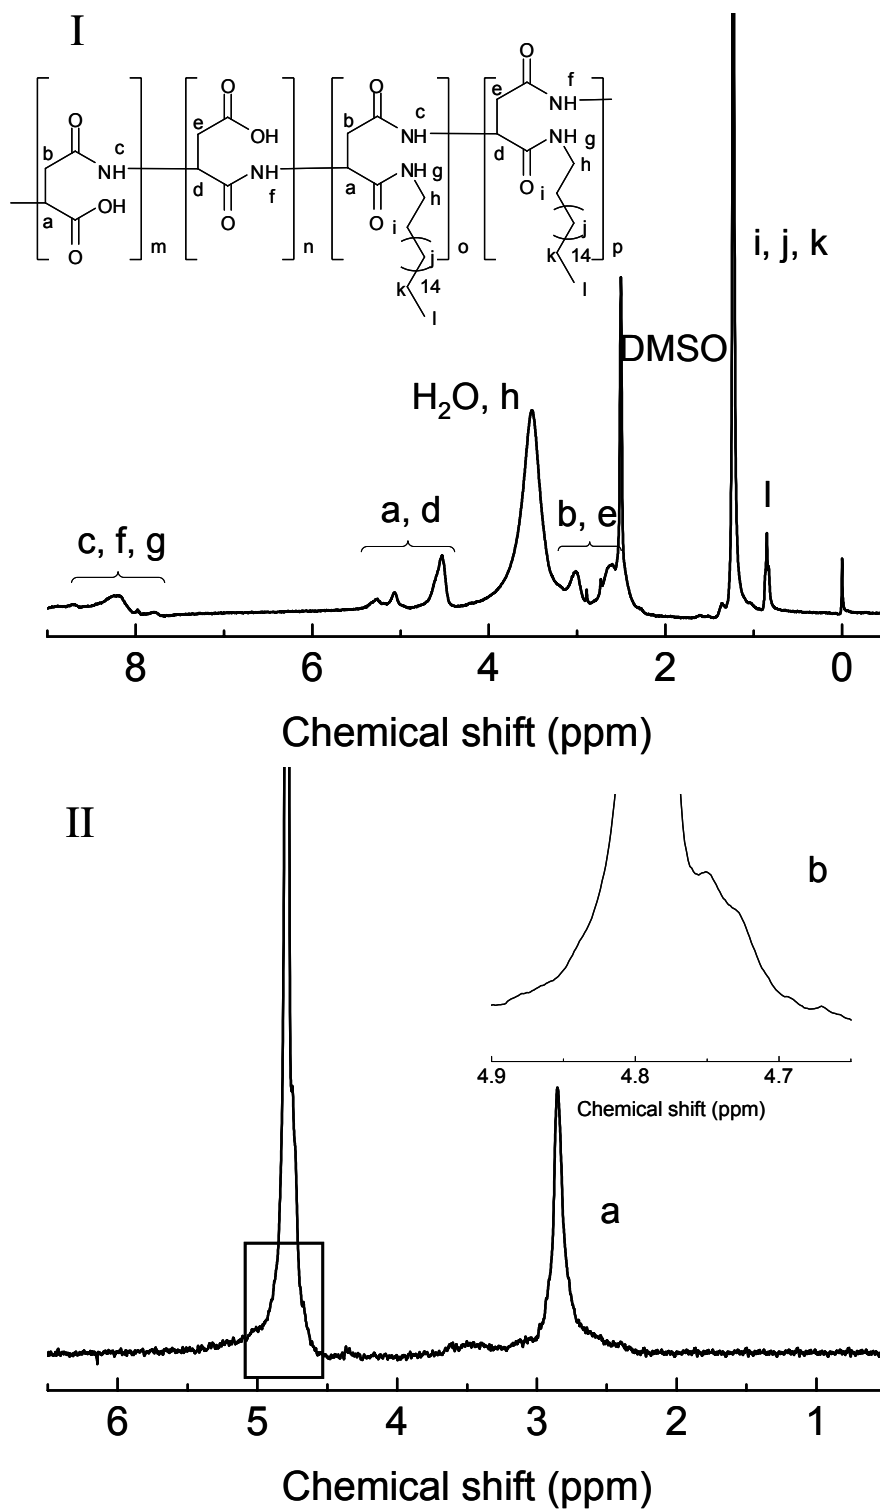

**Supplementary Figure 2.**  $^1\text{H}$  NMR spectra of PASP-g-OD in  $\text{DMSO-D}_6$  (I) and  $\text{D}_2\text{O}$  (II).

## Notes and references

1. B. Lu, X. D. Xu, X. Z. Zhang, S. X. Cheng, R. X. Zhuo, *Biomacromolecules*, 2008, **9**, 2594.
